# Supplementary material
Source: HighWire-hosted journal article supplement (https://erj.ersjournals.com/content/49/6/1601838)
Supplement: inline-supplementary-material-2 [file inline-supplementary-material-2.pdf]

**Table S3. Clinical characteristics of patients with panel-consensus LCNEC meeting all WHO 2015 criteria (N=108)**

| Clinical characteristic                 | Total cohort | Chemotherapy clusters |            |            | NSCLC-t versus      |                   |
|-----------------------------------------|--------------|-----------------------|------------|------------|---------------------|-------------------|
|                                         | Total        | NSCLC-t               | NSCLC-pt   | SCLC-t     | NSCLC-pt            | SCLC-t            |
|                                         | N (%)        | N (%)                 | N (%)      | N (%)      | P-value             | P-value           |
| <b>Patients</b>                         | 108 (100)    | 51 (47)               | 16 (15)    | 41 (38)    | -                   | -                 |
| <b>Age</b> (median, IQR)                | 65 (55-71)   | 65 (55-69)            | 68 (57-74) | 63 (54-71) | 0.62 <sup>i</sup>   | 0.82 <sup>i</sup> |
| <b>Gender</b> (males)                   | 61 (57)      | 28 (55)               | 8 (50)     | 25 (61)    |                     |                   |
| <b>Number of organs with metastases</b> |              |                       |            |            | 1.00 <sup>†</sup> * | 0.04 <sup>†</sup> |
| 1                                       | 48 (45)      | 22 (43)               | 10 (62)    | 16 (39)    |                     |                   |
| 2                                       | 41 (38)      | 23 (45)               | 5 (31)     | 13 (32)    |                     |                   |
| 3                                       | 9 (8)        | 1 (2)                 | 0 (0)      | 8 (19)     |                     |                   |
| >3                                      | 10 (9)       | 5 (10)                | 1 (6)      | 4 (10)     |                     |                   |
| <b>Organ metastases at diagnosis</b>    |              |                       |            |            |                     |                   |
| Bone                                    | 31 (29)      | 12 (24)               | 5 (31)     | 14 (34)    | 0.53                | 0.26              |
| Liver                                   | 62 (57)      | 28 (55)               | 10 (63)    | 24 (59)    | 0.59                | 0.72              |
| Brain                                   | 15 (14)      | 8 (16)                | 0 (0)      | 7 (17)     | 0.18                | 0.86              |
| Adrenal gland                           | 14 (13)      | 8 (16)                | 0 (0)      | 6 (15)     | 0.18                | 0.88              |
| Lung                                    | 13 (12)      | 7 (14)                | 2 (13)     | 4 (10)     | 1.00                | 0.75*             |
| Pleura                                  | 2 (2)        | 1 (2)                 | 0 (0)      | 1 (2)      | 1.00*               | 1.00*             |
| Lymph node                              | 23 (21)      | 11 (22)               | 4 (25)     | 8 (20)     | 0.74                | 0.81              |
| <b>Non-clustered subtype of CT</b>      |              |                       |            |            | -                   | -                 |
| Gemcitabine                             | 38 (35)      | 38 (75)               | -          | -          |                     |                   |
| Paclitaxel                              | 7 (7)        | 7 (14)                | -          | -          |                     |                   |
| Docetaxel                               | 5 (5)        | 5 (10)                | -          | -          |                     |                   |
| Vinorelbine                             | 1 (1)        | 1 (2)                 | -          | -          |                     |                   |
| Etoposide                               | 41 (38)      | -                     | -          | 41 (100)   |                     |                   |
| Pemetrexed                              | 16 (15)      | -                     | 16 (100)   | -          |                     |                   |
| <b>Cycles of chemotherapy</b>           |              |                       |            |            | 0.30 <sup>‡</sup>   | 0.20 <sup>‡</sup> |
| 1                                       | 14 (13)      | 4 (8)                 | 2 (14)     | 8 (20)     |                     |                   |
| 2                                       | 12 (11)      | 5 (10)                | 3 (19)     | 4 (10)     |                     |                   |
| 3                                       | 12 (11)      | 5 (10)                | 2 (13)     | 5 (12)     |                     |                   |
| 4                                       | 63 (49)      | 26 (51)               | 9 (56)     | 19 (46)    |                     |                   |
| >4                                      | 15 (14)      | 10 (20)               | 0 (0)      | 5 (12)     |                     |                   |
| Data lacking                            | 1 (1)        | 1 (2)                 | 0 (0)      | 0 (0)      |                     |                   |
| <b>Additional chemotherapy</b>          |              |                       |            |            |                     |                   |
| Second line                             | 25 (23)      | 11 (22)               | 3 (19)     | 11 (27)    | 1.00*               | 0.56              |
| Third line                              | 5 (5)        | 3 (6)                 | 0 (0)      | 2 (5)      | 1.00*               | 1.00*             |

*Abbreviations:* IQR, interquartile range; N, Number; CT, chemotherapy; NSCLC-t, cluster of gemcitabine, paclitaxel, docetaxel and vinorelbine chemotherapy; NSCLC-pt, cluster of pemetrexed chemotherapy; SCLC-t; cluster of etoposide chemotherapy; WHO, World Health Organization.

<sup>i</sup> Tested with Mann Whitney U test

<sup>†</sup> Compared ≤2 organ metastases with >2 organ metastases.

<sup>‡</sup> Compared ≤2 cycles versus ≥3 cycles of chemotherapy, excluding unknown cases.

\* Tested with Fisher Exact test

**Table S4. Clinical characteristics of patients diagnosed with LCNEC in the routine practice (N=164)**

| Clinical characteristic                   | Total cohort  | Chemotherapy clusters |                |               | NSCLC-t vs.       |                   |
|-------------------------------------------|---------------|-----------------------|----------------|---------------|-------------------|-------------------|
|                                           | Total         | NSCLC-t               | NSCLC-pt       | SCLC-t        | NSCLC-pt          | SCLC-t            |
|                                           | N (%)         | N (%)                 | N (%)          | N (%)         | P-value           | P-value           |
| <b>Patients</b>                           | 164 (100)     | 72 (44)               | 22 (13)        | 70 (43)       | -                 | -                 |
| <b>Overall survival (95% CI)</b>          | 7.6 [6.9-8.3] | 7.8 [6.5-9.2]         | 7.9 [5.3-10.4] | 6.8 [5.7-7.9] | 0.74              | 0.17              |
| <b>Progression free survival (95% CI)</b> | 5.0 [4.6-5.5] | 5.3 [4.5-6.2]         | 4.6 [3.7-5.5]  | 4.8 [4.2-5.3] | 0.96†             | 0.41†             |
| <b>Age (Median, IQR)</b>                  | 63 (56-70)    | 64 (56-70)            | 69 (58-74)     | 63 (53-69)    | 0.81 <sup>i</sup> | 0.31 <sup>i</sup> |
| <b>Gender (males)</b>                     | 86 (52)       | 35 (49)               | 10 (46)        | 41 (59)       | 0.80              | 0.23              |
| <b>Number of organs with metastases</b>   |               |                       |                |               | 1.00†*            | 0.008†*           |
| 1                                         | 71 (43)       | 33 (46)               | 14 (64)        | 24 (34)       |                   |                   |
| 2                                         | 59 (36)       | 30 (42)               | 5 (23)         | 24 (34)       |                   |                   |
| 3                                         | 20 (12)       | 4 (5)                 | 2 (9)          | 14 (20)       |                   |                   |
| >3                                        | 14 (9)        | 5 (7)                 | 1 (4)          | 8 (12)        |                   |                   |
| <b>Organ metastases at diagnosis</b>      |               |                       |                |               |                   |                   |
| Bone                                      | 49 (30)       | 20 (28)               | 3 (14)         | 26 (37)       | 0.18              | 0.23              |
| Liver                                     | 83 (51)       | 34 (47)               | 8 (36)         | 41 (59)       | 0.37*             | 0.18              |
| Brain                                     | 34 (21)       | 12 (17)               | 5 (23)         | 15 (21)       | 0.76*             | 0.48              |
| Adrenal gland                             | 32 (20)       | 14 (20)               | 5 (23)         | 13 (19)       | 0.77*             | 0.90              |
| Lung                                      | 25 (15)       | 12 (17)               | 1 (5)          | 12 (17)       | 0.29*             | 0.94              |
| Pleura                                    | 3 (2)         | 2 (3)                 | 0 (0)          | 1 (1)         | 1.00*             | 1.00*             |
| Lymph node                                | 28 (17)       | 13 (18)               | 8 (36)         | 7 (10)        | 0.09              | 0.17              |
| <b>Non-clustered subtype of CT</b>        |               |                       |                |               | -                 | -                 |
| Gemcitabine                               | 57 (35)       | 57 (79)               | -              | -             |                   |                   |
| Paclitaxel                                | 9 (6)         | 9 (13)                | -              | -             |                   |                   |
| Docetaxel                                 | 5 (3)         | 5 (7)                 | -              | -             |                   |                   |
| Vinorelbine                               | 1 (1)         | 1 (1)                 | -              | -             |                   |                   |
| Etoposide                                 | 70 (42)       | -                     | -              | 70 (100)      |                   |                   |
| Pemetrexed                                | 22 (13)       | -                     | 22 (100)       | -             |                   |                   |
| <b>Cycles of chemotherapy</b>             |               |                       |                |               | 0.35‡*            | 0.16‡             |
| 1                                         | 20 (12)       | 6 (8)                 | 2 (9)          | 12 (17)       |                   |                   |
| 2                                         | 15 (9)        | 5 (7)                 | 4 (18)         | 6 (9)         |                   |                   |
| 3                                         | 19 (12)       | 11 (16)               | 2 (9)          | 6 (9)         |                   |                   |
| 4                                         | 83 (51)       | 36 (50)               | 14 (64)        | 33 (47)       |                   |                   |
| >4                                        | 24 (15)       | 11 (15)               | 0 (0)          | 13 (19)       |                   |                   |
| Data lacking                              | 3 (2)         | 3 (4)                 | 0 (0)          | 0 (0)         |                   |                   |
| <b>Additional chemotherapy</b>            |               |                       |                |               |                   |                   |
| Second line                               | 44 (27)       | 18 (25)               | 5 (23)         | 21 (30)       | 0.83              | 0.51              |
| Third line                                | 6 (4)         | 3 (4)                 | 1 (5)          | 2 (3)         | 1.00              | 1.00*             |

Abbreviations: IQR, interquartile range; N, Number; CT, chemotherapy; CI, 95% confidence interval; ; NSCLC-t, clustered platinum gemcitabine, paclitaxel, docetaxel or vinorelbine chemotherapy; NSCLC-pt, NSCLC platinum-pemetrexed chemotherapy; SCLC-t, SCLC platinum-etoposide chemotherapy.

† N=154 patients; <sup>i</sup> Tested with Mann Whitney U test; † Compared ≤2 organ metastases with >2 organ metastases;

‡ Compared ≤2 cycles versus ≥3 cycles of chemotherapy, excluding unknown cases; \* Tested with Fisher Exact test

**Table S5. Comparison of characteristics of patients with complete and with lacking chemotherapy data diagnosed with LCNEC in the routine pathology practice (N=225).**

| Clinical characteristic                 | Total cohort  | Chemotherapy information |                |                   |
|-----------------------------------------|---------------|--------------------------|----------------|-------------------|
|                                         | Total         | Complete                 | unavailable    | versus            |
|                                         | N (%)         | N (%)                    | N (%)          | P-value           |
| <b>Patients</b>                         | 225 (100)     | 164 (73)                 | 61 (27)        | -                 |
| <b>OS</b> (95% CI)                      | 7.9 [7.1-8.7] | 7.6 [6.9-8.3]            | 9.2 [7.7-10.6] | 0.16              |
| <b>Age</b> (Median, IQR)                | 63 (56-70)    | 63 (56-70)               | 62 (56-69)     | 0.50 <sup>i</sup> |
| <b>Gender</b> (males)                   | 130 (58)      | 86 (52)                  | 44 (72)        | <b>0.01</b>       |
| <b>Number of organs with metastases</b> |               |                          |                | 0.68              |
| 1                                       | 102 (47)      | 75 (48)                  | 27 (47)        |                   |
| 2                                       | 75 (35)       | 52 (33)                  | 23 (40)        |                   |
| 3                                       | 25 (12)       | 19 (12)                  | 6 (10)         |                   |
| >3                                      | 13 (6)        | 11 (7)                   | 2 (3)          |                   |

*Abbreviations:* 95% CI, 95% confidence interval; IQR, interquartile range; N, Number; LCNEC, large cell neuroendocrine carcinoma.

<sup>i</sup> Tested with Mann Whitney U test
